# Supplementary material
Source: HighWire-hosted journal article supplement (http://www.qdcxjkg.com/highwire/filestream/121512/field_highwire_adjunct_files/3/ERJ-00159-2015_Fig_E4.pdf)

**Fig E4**

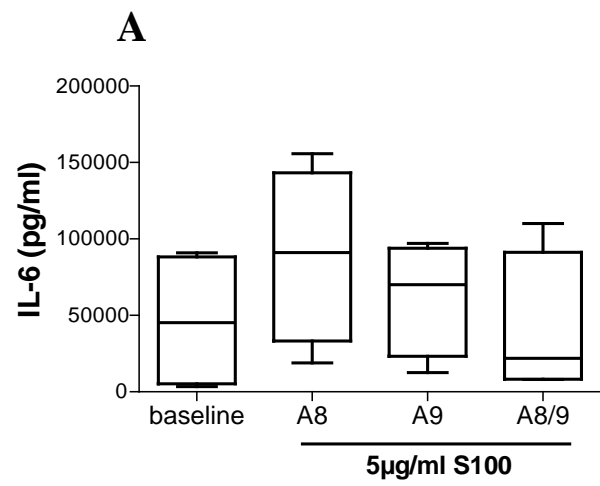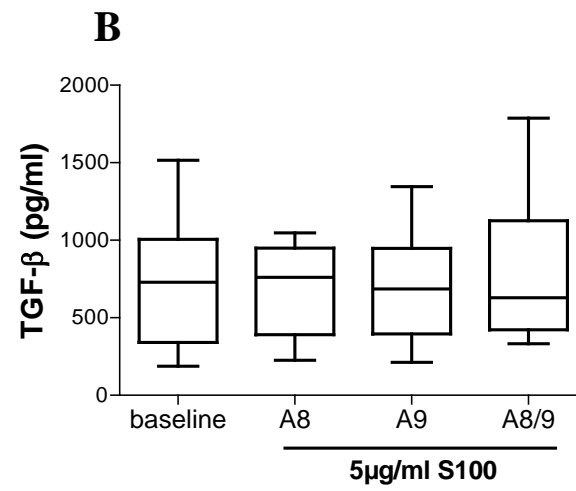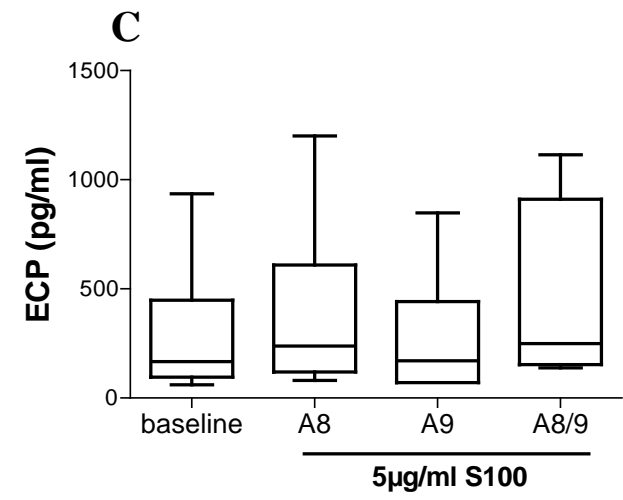

Supplement: ERJ-00159-2015_Fig_E4.pdf [file ERJ-00159-2015_Fig_E4.pdf]
